# Supplementary material
Source: publisher site journal article supplement (https://www.dovepress.com/get_supplementary_file.php?f=266478.docx)
Supplement: Supplementary file 1 [file get_supplementary_file.php]

**Supplemental material**

**Diagnostic value of serum insulin-like growth factor binding protein 7 (IGFBP7) in colorectal cancer**

**Supplementary Figure 1**

**CRC: colorectal cancer.**
